# Supplementary material for: Hollow Porous CoO@Reduced Graphene Oxide Self-Supporting Flexible Membrane for High Performance Lithium-Ion Storage
Source: MDPI journal article supplement (doi:10.3390/nano13131986), 2023-06-30
Supplement: s1 [file s1]

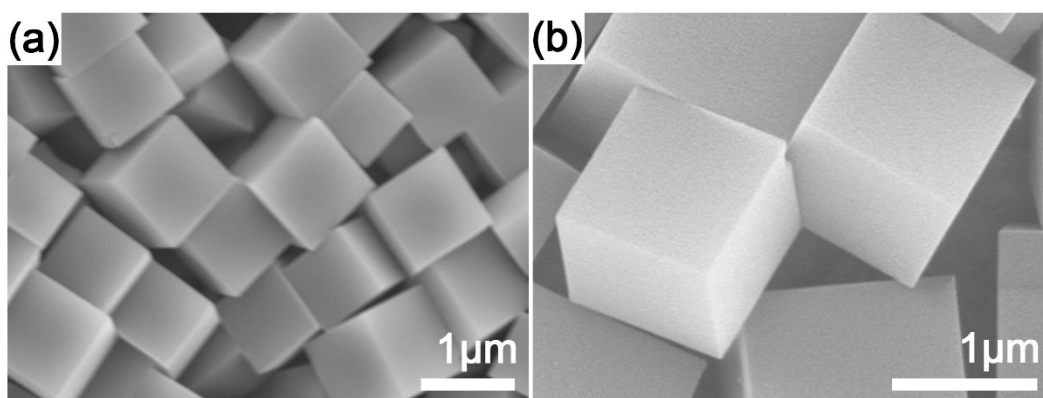

**Figure. S1** SEM images of Co-MOF nanocubes at different magnifications.

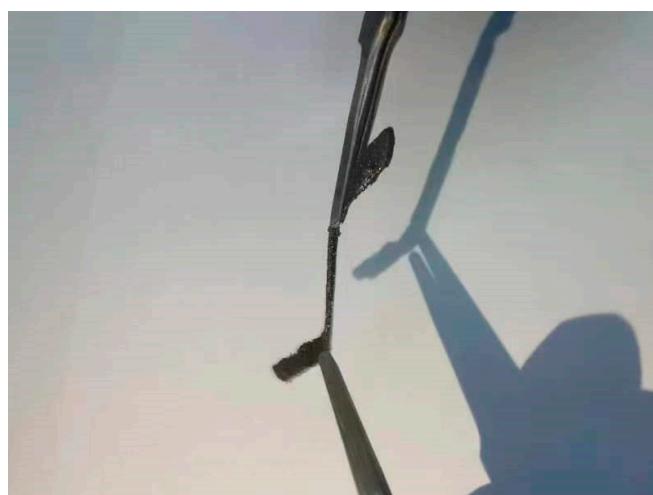

**Figure. S2** Digital images of CoO@rGO films ;

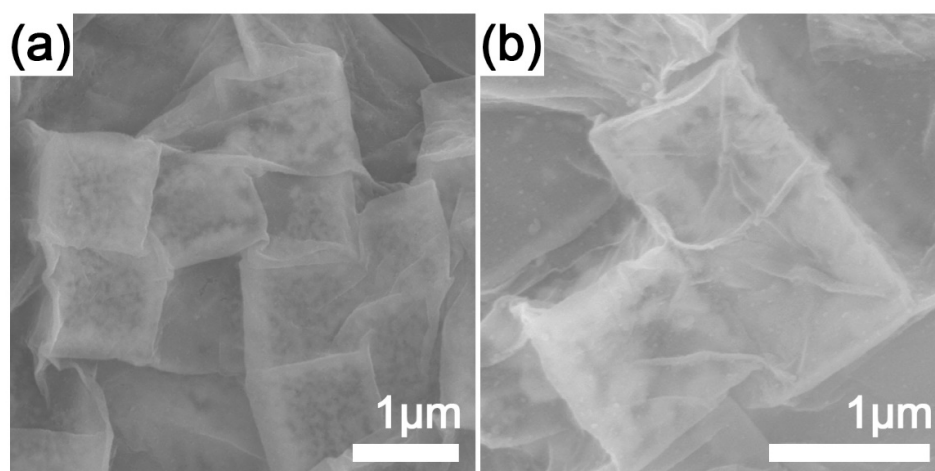

**Figure. S3** SEM images of hollow porous CoO@rGO flexible film

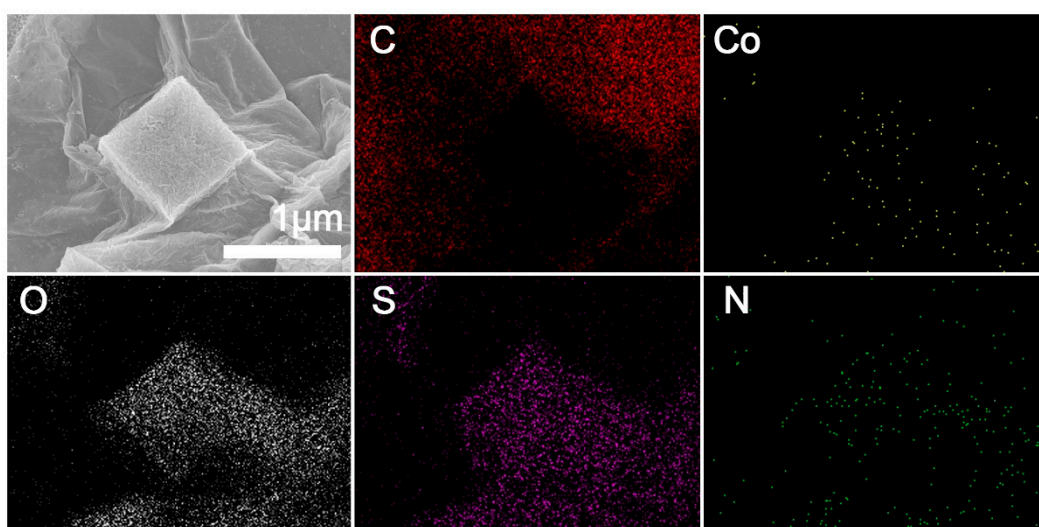

**Figure. S4** EDS analysis of the hollow porous CoO@rGO flexible film.

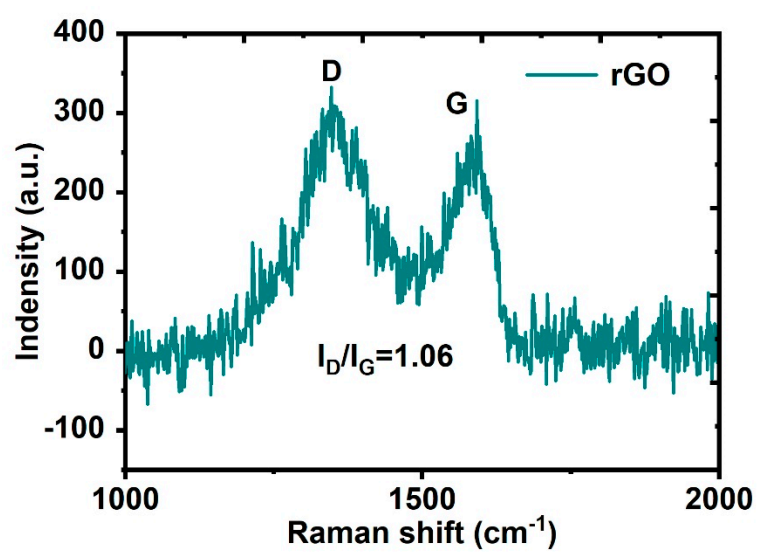

**Figure. S5** Raman spectra of rGo flexible film.

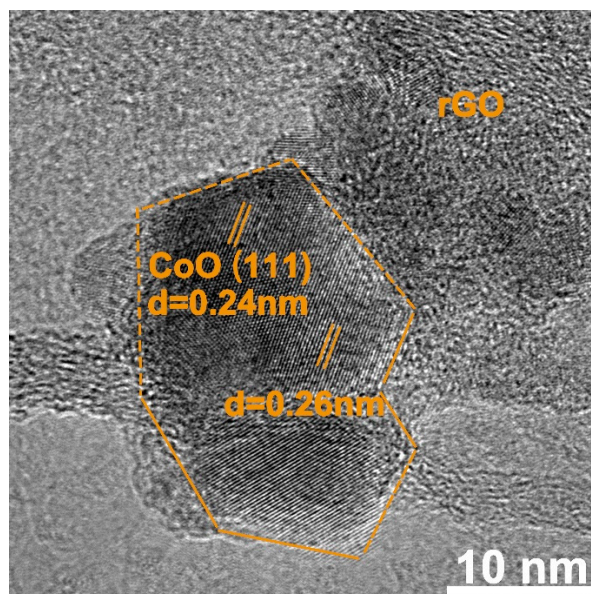

**Figure. S6** HRTEM image of Co-MOF@rGO

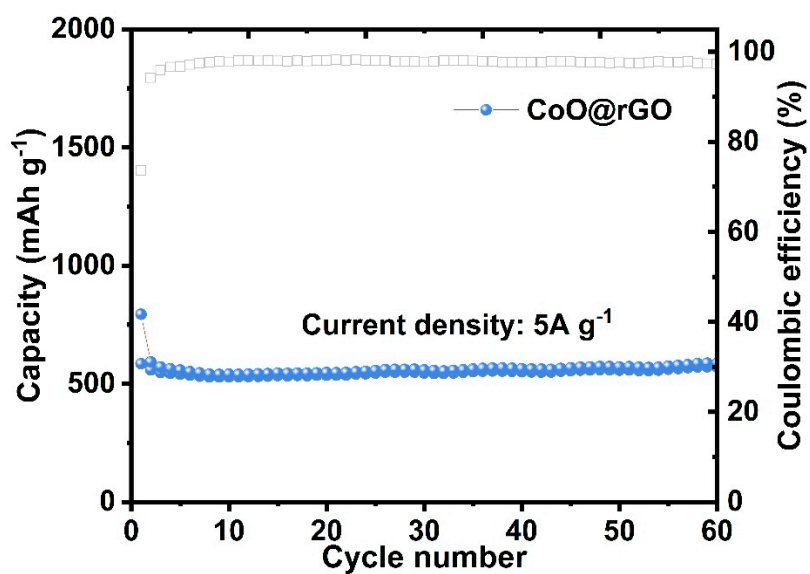

**Figure. S7** Cycling performance at 5 A g<sup>-1</sup> of CoO@rGO flexible film for LIBs

Table S1 Comparison of electrochemical performances for this work.

| Electrode | Current density<br>(mA g <sup>-1</sup> ) | specific capacity<br>(mAh g <sup>-1</sup> ) | Cycle number<br>(cycles) | Coulombic<br>efficiency<br>(%) |
|-----------|------------------------------------------|---------------------------------------------|--------------------------|--------------------------------|
| CoO       | 1000                                     | 483                                         | 600                      | 99.7                           |
| rGO       | 1000                                     | 155                                         | 600                      | 99.7                           |
| CoO@rGO   | 1000                                     | 1103                                        | 600                      | 99.1                           |

|         |      |     |    |      |
|---------|------|-----|----|------|
| CoO@rGO | 5000 | 586 | 60 | 97.2 |
|---------|------|-----|----|------|

Table S2 Test conditions and electrochemical performances of Co-based LIBs anodes.

| Electrode                                      | Current density<br>(mA g <sup>-1</sup> ) | specific capacity<br>(mAh g <sup>-1</sup> ) | Cycle number<br>(cycles) | reference |
|------------------------------------------------|------------------------------------------|---------------------------------------------|--------------------------|-----------|
| CoO hollow spheres                             | 100                                      | 584                                         | 50                       | 1         |
| CoO octahedral nanocages                       | 200                                      | 807                                         | 50                       | 2         |
| Core-shell Co@CoO                              | 50                                       | 800                                         | 50                       | 3         |
| Co <sub>3</sub> O <sub>4</sub> Nps             | 50                                       | 817                                         | 30                       | 4         |
| Co <sub>3</sub> O <sub>4</sub> nanocages       | 50                                       | 970                                         | 30                       | 5         |
| Co <sub>3</sub> O <sub>4</sub> @graphene       | 200                                      | 941                                         | 60                       | 6         |
| MWCNTs/Co <sub>3</sub> O <sub>4</sub>          | 1000                                     | 514                                         | 100                      | 7         |
| Carbon-doped Co <sub>3</sub> O <sub>4</sub>    | 200                                      | 1121                                        | 100                      | 8         |
| Hollow Co <sub>3</sub> O <sub>4</sub> /N,S-rGO | 1000                                     | 1590                                        | 60                       | 9         |
| Co <sub>3</sub> O <sub>4</sub> /CuO nanowire   | 1000                                     | 810                                         | 500                      | 10        |
| CoO/CoFe <sub>2</sub> O <sub>4</sub>           | 1000                                     | 603                                         | 100                      | 11        |
| SiO <sub>x</sub> @C@CoO                        | 1000                                     | 714                                         | 750                      | 12        |
| <b>This work</b>                               | <b>1000</b>                              | <b>1103</b>                                 | <b>600</b>               |           |
|                                                | <b>5000</b>                              | <b>586</b>                                  | <b>60</b>                |           |

Reference:

1 Li, F.; Zou, Q.-Q.; Xia, Y.-Y. CoO-Loaded Graphitable Carbon Hollow Spheres as Anode Materials for Lithium-Ion Battery. *Journal of Power Sources* 2008, 177, 546–552, doi:10.1016/j.jpowsour.2007.10.097.

2 Guan, H.; Wang, X.; Li, H.; Zhi, C.; Zhai, T.; Bando, Y.; Golberg, D. CoO Octahedral Nanocages for High-Performance Lithium Ion Batteries. *Chemical Communications* 2012, 48, 4878–4880, doi:10.1039/C2CC30843F.

3 Zhang, L.; Hu, P.; Zhao, X.; Tian, R.; Zou, R.; Xia, D. Controllable Synthesis of Core–Shell Co@CoO Nanocomposites with a Superior Performance as an Anode Material for Lithium-Ion Batteries. *Journal of Materials Chemistry* 2011, 21, 18279–18283, doi:10.1039/C1JM12990B.

4 Wu, Z.-S.; Ren, W.; Wen, L.; Gao, L.; Zhao, J.; Chen, Z.; Zhou, G.; Li, F.; Cheng, H.-M. Graphene Anchored with Co<sub>3</sub>O<sub>4</sub> Nanoparticles as Anode of Lithium Ion Batteries with Enhanced Reversible Capacity and Cyclic Performance. *ACS Nano* 2010, 4, 3187–3194, doi:10.1021/nn100740x.

5 Yan, N.; Hu, L.; Li, Y.; Wang, Y.; Zhong, H.; Hu, X.; Kong, X.; Chen, Q. Co<sub>3</sub>O<sub>4</sub> Nanocages for High-Performance Anode Material in Lithium-Ion Batteries. *J. Phys. Chem. C* 2012, 116, 7227–7235, doi:10.1021/jp2126009.

- 6 Li, B.; Cao, H.; Shao, J.; Li, G.; Qu, M.; Yin, G. Co<sub>3</sub>O<sub>4</sub>@graphene Composites as Anode Materials for High-Performance Lithium Ion Batteries. *Inorg. Chem.* 2011, 50, 1628–1632, doi:10.1021/ic1023086.
- .
- 7 Huang, G.; Zhang, F.; Du, X.; Qin, Y.; Yin, D.; Wang, L. Metal Organic Frameworks Route to in Situ Insertion of Multiwalled Carbon Nanotubes in Co<sub>3</sub>O<sub>4</sub> Polyhedra as Anode Materials for Lithium-Ion Batteries. *ACS Nano* 2015, 9, 1592–1599, doi:10.1021/nn506252u.
- 8 Yan, C.; Chen, G.; Zhou, X.; Sun, J.; Lv, C. Template-Based Engineering of Carbon-Doped Co<sub>3</sub>O<sub>4</sub> Hollow Nanofibers as Anode Materials for Lithium-Ion Batteries. *Advanced Functional Materials* 2016, 26, 1428–1436, doi:10.1002/adfm.201504695.
- 9 Zhu, J.; Tu, W.; Pan, H.; Zhang, H.; Liu, B.; Cheng, Y.; Deng, Z.; Zhang, H. Self-Templating Synthesis of Hollow Co<sub>3</sub>O<sub>4</sub> Nanoparticles Embedded in N,S-Dual-Doped Reduced Graphene Oxide for Lithium Ion Batteries. *ACS Nano* 2020, 14, 5780–5787, doi:10.1021/acsnano.0c00712.
- 10 Wang, J.; Zhang, Q.; Li, X.; Xu, D.; Wang, Z.; Guo, H.; Zhang, K. Three-Dimensional Hierarchical Co<sub>3</sub>O<sub>4</sub>/CuO Nanowire Heterostructure Arrays on Nickel Foam for High-Performance Lithium Ion Batteries. *Nano Energy* 2014, 6, 19–26, doi:10.1016/j.nanoen.2014.02.012.
- 11 Li, M.; Yin, Y.-X.; Li, C.; Zhang, F.; Wan, L.-J.; Xu, S.; G. Evans, D. Well-Dispersed Bi-Component-Active CoO/CoFe<sub>2</sub>O<sub>4</sub> Nanocomposites with Tunable Performances as Anode Materials for Lithium-Ion Batteries. *Chemical Communications* 2012, 48, 410–412, doi:10.1039/C1CC15322F.
- .
- 12 Wang, P.; Sun, Z.; Liu, H.; Gao, Z.-W.; Hu, J.; Yin, W.-J.; Ke, Q.; Lu Zhu, H. Strategic Synthesis of Sponge-like Structured SiO<sub>x</sub>@C@CoO Multifunctional Composites for High-Performance and Stable Lithium-Ion Batteries. *Journal of Materials Chemistry A* 2021, 9, 18440–18453, doi:10.1039/D1TA02880D
